# Supplementary material for: Properties of Therapeutic Deep Eutectic Solvents of l-Arginine and Ethambutol for Tuberculosis Treatment
Source: PubMed Central journal article supplement (PMC6337512; doi:10.3390/molecules24010055), 2018-12-24
Supplement: molecules-24-00055-s001.pdf [file molecules-24-00055-s001.pdf]

Supplementary Materials

# Properties of Therapeutic Deep Eutectic Solvents of L-Arginine and Ethambutol for Tuberculosis Treatment

Filipa Santos <sup>1</sup>, Maria Inês P.S. Leitão <sup>2</sup> and Ana Rita C. Duarte <sup>1,\*</sup>

<sup>1</sup> LAQV, REQUIMTE, Departamento de Química da Faculdade de Ciências e Tecnologia, Universidade Nova de Lisboa, 2829-516 Caparica, Portugal; mfca.santos@campus.fct.unl.pt

<sup>2</sup> ITQB–Instituto de Tecnologia Química e Biológica, Universidade Nova de Lisboa, Estação Agronómica Nacional, Av. Da República, 2780-157 Oeiras, Portugal; inesleita@itqb.unl.pt

\* Correspondence: aduarte@fct.unl.pt; Tel.: +351-212-949-680

Table S1. Different eutectic systems prepared, during optimization process.

| Component A | Component B | Component C      | Molar Ratio                                                         | Visual Aspect                                     |
|-------------|-------------|------------------|---------------------------------------------------------------------|---------------------------------------------------|
| Citric Acid | L-Arginine  |                  | 1:1; 1:2; 2:1                                                       | White Solid                                       |
| Citric Acid | L-Arginine  | H <sub>2</sub> O | 1:1:3; 1:2:3; 2:1:3                                                 | White Solid                                       |
| Citric Acid | L-Arginine  | H <sub>2</sub> O | 1:1:5; 1:2:5                                                        | Transparent viscous liquid with white precipitate |
| Citric Acid | Ethambutol  |                  | 1:1; 1:2; 2:1; 5:2; 7:3                                             | White Solid                                       |
| Citric Acid | Ethambutol  | H <sub>2</sub> O | 1:2:4; 2:1:6; 4:1:4; 4:1:5;<br>4:1:7; 4:1:9; 5:1:2; 5:1:4;<br>5:1:9 | White Solid                                       |
| Citric Acid | Ethambutol  | H <sub>2</sub> O | 1:1:6                                                               | Transparent viscous liquid with white precipitate |

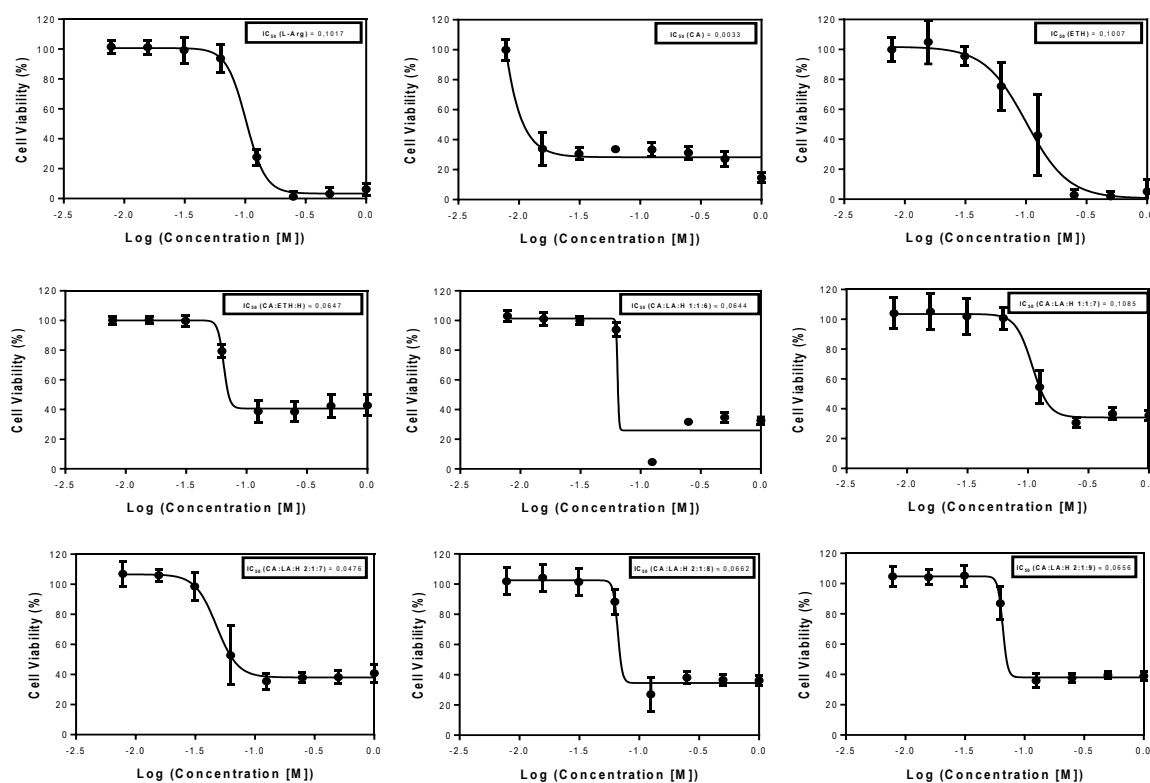

Figure S1. IC<sub>50</sub> graphs with log concentrations and cell viability used to determine IC<sub>50</sub>.

**Table S2.** <sup>1</sup>H and <sup>13</sup>C NMR chemical shifts.

| Compound                                         | Chemical Shift <sup>1</sup> H (ppm) |                  |       |      |      |      | Chemical Shift <sup>13</sup> C (ppm) |          |       |                      |
|--------------------------------------------------|-------------------------------------|------------------|-------|------|------|------|--------------------------------------|----------|-------|----------------------|
|                                                  | -CH <sub>2</sub>                    | -CH <sub>2</sub> | -COH  | -COH | -OH  | -NH  | -C=O                                 | 2 x -C=O | -COH  | 2 x -CH <sub>2</sub> |
| Citric Acid                                      | 2,75                                | 2,65             | 12,37 | 5,15 | -    | -    | 174,83                               | 171,58   | 72,74 | 43,01                |
| Ethambutol                                       | -                                   | -                | -     | -    | 9,24 | 5,40 | -                                    | -        | -     | -                    |
| Citric Acid:Ethambutol:H <sub>2</sub> O (2:1:10) | 2,75                                | 2,65             | 12,34 | 5,15 | 9,14 | 5,40 | 174,67                               | 171,45   | 72,59 | 42,82                |
| Citric Acid:L-Arginine:H <sub>2</sub> O (1:1:6)  | 2,57                                | 2,50             | -     | -    | -    | -    | 177,34                               | 172,09   | 71,87 | 44,50                |
| Citric Acid:L-Arginine:H <sub>2</sub> O (1:1:7)  | 2,58                                | 2,51             | -     | -    | -    | -    | 176,97                               | 171,70   | 71,67 | 44,29                |
| Citric Acid:L-Arginine:H <sub>2</sub> O (2:1:7)  | 2,64                                | 2,56             | -     | -    | -    | -    | 176,12                               | 171,52   | 71,99 | 43,72                |
| Citric Acid:L-Arginine:H <sub>2</sub> O (2:1:8)  | 2,66                                | 2,57             | -     | -    | -    | -    | 176,02                               | 171,65   | 72,14 | 43,66                |
| Citric Acid:L-Arginine:H <sub>2</sub> O (2:1:9)  | 2,65                                | 2,56             | -     | -    | -    | -    | 176,28                               | 171,82   | 72,22 | 43,82                |
